# Supplementary material for: Validation of the Electronic Version of the International Index of Erectile Function (IIEF-5 and IIEF-15): A Crossover Study
Source: PubMed Central journal article supplement (PMC6634948; doi:10.2196/13490), 2019-07-02
Supplement: jmir_v21i7e13490_app2.pdf [file jmir_v21i7e13490_app2.pdf]

## Supplement 2:

All individual items of the paper-electronic and test-retest groups of the IIEF-5 and IIEF-15

| <b>IIEF – item</b> | <b>(Mean ± SD)</b>               | <b>(Mean ± SD)</b>               |
|--------------------|----------------------------------|----------------------------------|
| <b>PE groups</b>   | <b>Paper</b>                     | <b>Electronic</b>                |
| IIEF5 – 1          | 3.61 ± 1.28                      | 3.63 ± 1.02                      |
| IIEF5 – 2          | 3.93 ± 1.60                      | 2.02 ± 1.53                      |
| IIEF5 – 3          | 3.61 ± 1.87                      | 1.78 ± 1.53                      |
| IIEF5 – 4          | 3.93 ± 1.77                      | 2.49 ± 1.87                      |
| IIEF5 – 5          | 3.66 ± 1.78                      | 1.63 ± 1.32                      |
| IIEF15 – 1         | 3.38 ± 1.91                      | 2.00 ± 1.71                      |
| IIEF15 – 2         | 2.79 ± 2.17                      | 2.00 ± 1.79                      |
| IIEF15 – 3         | 2.56 ± 2.34                      | 1.18 ± 1.47                      |
| IIEF15 – 4         | 2.50 ± 2.40                      | 1.18 ± 1.47                      |
| IIEF15 – 5         | 2.44 ± 2.26                      | 1.21 ± 1.50                      |
| IIEF15 – 6         | 1.41 ± 1.52                      | 2.24 ± 2.10                      |
| IIEF15 – 7         | 2.65 ± 2.39                      | 1.21 ± 1.49                      |
| IIEF15 – 8         | 2.29 ± 2.10                      | 1.35 ± 1.39                      |
| IIEF15 – 9         | 3.18 ± 2.04                      | 1.82 ± 1.51                      |
| IIEF15 – 10        | 3.29 ± 2.02                      | 2.15 ± 1.78                      |
| IIEF15 – 11        | 3.09 ± 1.38                      | 3.06 ± 1.25                      |
| IIEF15 – 12        | 3.06 ± 1.10                      | 3.00 ± 0.99                      |
| IIEF15 – 13        | 3.50 ± 1.29                      | 3.47 ± 1.13                      |
| IIEF15 – 14        | 3.50 ± 1.31                      | 3.50 ± 1.21                      |
| IIEF15 – 15        | 3.35 ± 1.30                      | 3.38 ± 1.21                      |
| <b>EE groups</b>   | <b>Electronic 1<sup>st</sup></b> | <b>Electronic 2<sup>nd</sup></b> |
| IIEF5 – 1          | 3.28 ± 1.31                      | 3.28 ± 1.17                      |
| IIEF5 – 2          | 1.92 ± 1.58                      | 1.76 ± 1.56                      |
| IIEF5 – 3          | 1.64 ± 1.66                      | 1.96 ± 1.74                      |
| IIEF5 – 4          | 2.52 ± 2.00                      | 2.80 ± 2.00                      |
| IIEF5 – 5          | 1.92 ± 1.61                      | 1.64 ± 1.38                      |
| IIEF15 – 1         | 1.55 ± 1.22                      | 1.50 ± 1.41                      |
| IIEF15 – 2         | 2.05 ± 1.70                      | 2.05 ± 1.86                      |
| IIEF15 – 3         | 1.64 ± 1.59                      | 1.59 ± 1.71                      |
| IIEF15 – 4         | 1.82 ± 1.87                      | 1.27 ± 1.55                      |
| IIEF15 – 5         | 1.36 ± 1.47                      | 1.27 ± 1.55                      |
| IIEF15 – 6         | 2.14 ± 2.08                      | 2.36 ± 2.11                      |
| IIEF15 – 7         | 1.32 ± 1.43                      | 1.27 ± 1.55                      |
| IIEF15 – 8         | 1.23 ± 1.27                      | 1.18 ± 1.33                      |
| IIEF15 – 9         | 2.09 ± 1.77                      | 2.00 ± 1.80                      |
| IIEF15 – 10        | 1.77 ± 1.34                      | 1.68 ± 1.62                      |
| IIEF15 – 11        | 3.45 ± 1.22                      | 3.27 ± 1.28                      |
| IIEF15 – 12        | 3.05 ± 1.09                      | 3.18 ± 1.05                      |
| IIEF15 – 13        | 3.41 ± 1.14                      | 3.45 ± 1.10                      |
| IIEF15 – 14        | 3.36 ± 1.40                      | 3.59 ± 1.26                      |
| IIEF15 – 15        | 3.18 ± 1.14                      | 3.09 ± 1.51                      |
